# Recovery of Meteorological Data for the Observatory of A Guarda, Spain

Juan A. Añel<sup>1,2\*</sup>, Marcos Blanco-Durán<sup>2</sup>, Luis Gimeno<sup>2</sup>, Laura de la Torre<sup>2</sup>

**1** Smith School of Enterprise and the Environment, University of Oxford, Oxford, United Kingdom, **2** EPhysLab, Facultad de Ciencias, Universidad de Vigo, Ourense, Galicia, Spain

## Abstract

We herein describe the recovery of a series of data on temperature, humidity, precipitation, evaporation, wind, and local weather conditions from documentary sources obtained from the Jesuit observatory of A Guarda (Galicia, Spain) for the period 1881–1896. The data were digitized and made available in accessible electronic formats. Comparisons were made with present-day meteorological data obtained from two nearby stations. We further believe that the discovery of some new complementary documentary sources made during the present research could be a basis for future data recovery efforts. Among these new results, early ozone data from the period are of outstanding importance to meteorologists.

**Citation:** Añel JA, Blanco-Durán M, Gimeno L, de la Torre L (2012) Recovery of Meteorological Data for the Observatory of A Guarda, Spain. PLoS ONE 7(6): e39281. doi:10.1371/journal.pone.0039281

**Editor:** Gil Bohrer, Ohio State University, United States of America

**Received:** January 12, 2012; **Accepted:** May 17, 2012; **Published:** June 29, 2012

**Copyright:** © 2012 Añel et al. This is an open-access article distributed under the terms of the Creative Commons Attribution License, which permits unrestricted use, distribution, and reproduction in any medium, provided the original author and source are credited.

**Funding:** This study was partially funded by the Ministerio de Medio Ambiente y Medio Rural y Marino (Spanish Ministry of Environment and Rural and Marine Areas) through the Salvá-Sinobas Project (Ref. 20080050083542) and the European Regional Development Fund. The funders had no role in study design, data collection and analysis, decision to publish, or preparation of the manuscript. No additional external funding received for this study.

**Competing Interests:** Co-author Juan A. Añel is a PLoS ONE Editorial Board member. This does not alter the authors' adherence to all the PLoS ONE policies on sharing data and materials.

\* E-mail: [juan.anel@smithschool.ox.ac.uk](mailto:juan.anel@smithschool.ox.ac.uk)

## Introduction

The recovery of instrumental meteorological records from printed manuscripts are of great importance for paleo-climatological studies [1]. The International Environmental Data Rescue Organization (IEDRO) states that the main benefits of data recovery lie in the study of climate change, as well as for disease prevention, flood forecasting, the design of safer infrastructure, the prevention of famine and for the general understanding of climate in historical terms. According to the World Meteorological Organization (WMO), such recovery includes the storage of the recovered data in the form of digital media that are easy to read and access [2]. The WMO recently introduced the Mediterranean climate data rescue (MEDARE) initiative, with the aim of developing and improving data recovery activities for the Greater Mediterranean Region [3]. They have been launched in the last years the “Data Rescue at Home” (<http://www.data-rescue-at-home.org/>) project as an “attempt to digitize historical weather data from all over the globe and the “International Atmospheric Circulation Reconstructions over the Earth (ACRE)” initiative [4]. Instrumental data recovery is of great importance for years before 1940's because of the lack of good meteorological records, and some efforts have already been made in respect of the North Atlantic region, for example, to reconstruct time series pertaining to the North Atlantic Oscillation (NAO) [5], which is the dominant mode of variability of winter climate in the North Atlantic region [6,7]. Particularly important in studies of this type are the Spanish historical archives, which are recognized to be a vast store of meteorological information that deserve special attention and could be used as a basis for data recovery efforts [8,9].

The Society of Jesus (the “Jesuits”) has maintained an interest in the natural sciences since its foundation in 1540. The results of such a scientific tradition (documentary sources, observatories, reports, etc.) are of broad interest in several disciplines, with meteorological and climatological studies being among the most prominent. The Jesuits were a highly educated community and the reliability of their data is likely to be high [10,11].

Combining these two issues of supply and demand, we herein present the results of a study of recovery and digitization of documentary sources of meteorological data obtained from the Jesuit observatory of A Guarda, Spain. The study was undertaken with the aim of contributing to global efforts in data rescue and for the study of regional climatological patterns for the northwestern Iberian Peninsula, a region strongly affected by the NAO [12,13]. The national weather services of Spain have previously recovered and digitized large amounts of meteorological data [14]. However, the location and period of measurement of the data here presented herein, together with the fact that the data were only ever sporadically transmitted to the national central observatory of Spain [15], make their systematic recovery particularly valuable.

The remainder of the paper is organized as follows: we first present a materials and methods section, containing information about the observatory, a description of the data series used for comparative purposes, and a description of the existing documentary sources, summarizing their information in a set of tables. Secondly, we present the results of the digitization of the data, some figures in which the historical data are compared with data from the present day, and we also describe a new documentary source discovered during the present study. In the conclusions, we discuss the outcomes of the project and suggest future avenues of enquiry.

## Materials and Methods

### The Observatory of A Guarda and Metadata

The observatory at the centre of our study was located in A Pasaxe, Santa Isabel de Camposancos, A Guarda, Pontevedra (Spain). According to the bibliographic data [16], it was situated at latitude  $41^{\circ}52'N$  and longitude  $5^{\circ}7'$  West of Madrid (Spain) ( $8^{\circ}49'$  West of the Greenwich meridian). It was part of the “Apóstol Santiago College” and owned by the Jesuits. The college was originally founded in 1872 in the city of A Coruña (approximately two hundred kilometers to the north) with the aim of eventually being the first private university in Spain, and it then moved to A Pasaxe in 1876. In its new location the observatory was located just a few meters from the Miño riverside, which is the geopolitical frontier between Spain and Portugal, and just a few kilometers from the Atlantic Ocean [11,15].

The observatory was at sea level (though in parts of the documentation is indicated to be in a height of eight meters) in a building with a hexagonal floor in the gardens of the main college. Its height was 2.5 m from floor to ceiling, with a total roof height of 0.8 m. Wooden planks were set in the eastern, southern and western walls like blinds, to avoid the direct impact of solar radiation on the instruments. All the instruments were located at an elevation of 1.5 m above the floor and the altitude of the barometer relative to mean sea level was 8 meters. The instrumentation in the observatory included:

- Walferdin maximum thermometer
- Rutherford minimum thermometer
- Bellani thermograph
- psychrometer
- Tonnelot rain gauge
- Eon Fils barometer
- evaporimeter
- minimum thermometer exposed to solar radiation
- maximum thermometer exposed to solar radiation
- weather vane

The observatory was operational by the end of November of 1880. From 1883 onwards, daily reports of the observations were sent to the Instituto Central Meteorológico de Madrid (the principal meteorological institute of Spain) and the data were published in annual bulletins. Furthermore, between 1881 and 1897 the observatory of A Guarda published a number of bulletins entitled “Colegio de La Guardia. Boletines meteorológicos” (A Guarda College. Meteorological bulletins). At some point between

1903 and 1911, the observatory was moved to a tower builded on the southern side of the college. We found no reference pertaining to the location of the observatory between 1911 and 1917. The observatory stopped working by 1917.

### Monte Aloia and Vigo-Peinador

In order to compare the data obtained from A Guarda with data from the present day, we used data from the automatic weather station “Monte Aloia” and the meteorological observatory “Peinador”. Monte Aloia is the closer weather station to A Guarda but it lies in a much higher altitude and its data series is short which makes harder the comparison of results based on pressure. Peinador is the closer observatory with a 30 years climatological series.

The Monte Aloia automatic weather station is operated and maintained by the Regional Government of Galicia. We chose this station for three main reasons. Firstly, it lies close to the former observatory of A Guarda, at approximately 27 km from its original location; secondly, the data series for this station for the period 2001–2010 show a good temporal homogeneity. Moreover, and thirdly, both the data and metadata are publicly available at <http://www.meteogalicia.es>. The station is located at  $42.08^{\circ}N$  and  $8.68^{\circ}W$ , and it lies at an elevation of 484 m above sea level.

The observatory located in Peinador (known as Vigo-Peinador) is operated by the Spanish meteorological agency (AEMET). The observatory is located at  $42.24^{\circ}N$  and  $8.62^{\circ}W$ , and it lies at an elevation of 261 m above sea level. The distance to the observatory of A Guarda is approximately 45 km. The data and metadata are available in the web page of AEMET (<http://www.aemet.es>) and at <http://eca.knmi.nl> provided by the ECA&D project [17].

### Materials

This study is based on the publications and observations made at the observatory by Father Baltasar Merino. Copies of his four notebooks (in Spanish), are kept at the library of the Observatori de l'Ebre, an observatory situated in Roquetes (Spain), which was also originally founded by the Jesuits. Figure 1 shows the period covered by the data recovered for the present study.

We now describe the documentary sources by applying the structure recently suggested by Brönnimann et al. [1].

**Notebook I.** Published in 1891, this is the first of the books on the meteorological characterization of the site written by Father Baltasar Merino. Its original title was “Resumen de las Observaciones Meteorológicas efectuadas en el Colegio de La Guardia, de la Compañía de Jesús, durante el decenio de 1881 a 1890” (Summary of the meteorological observations for the A

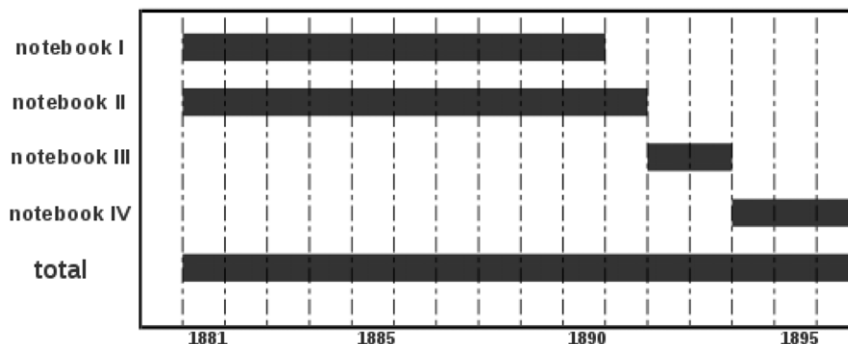

**Figure 1. Period covered by the data recovered.**

doi:10.1371/journal.pone.0039281.g001

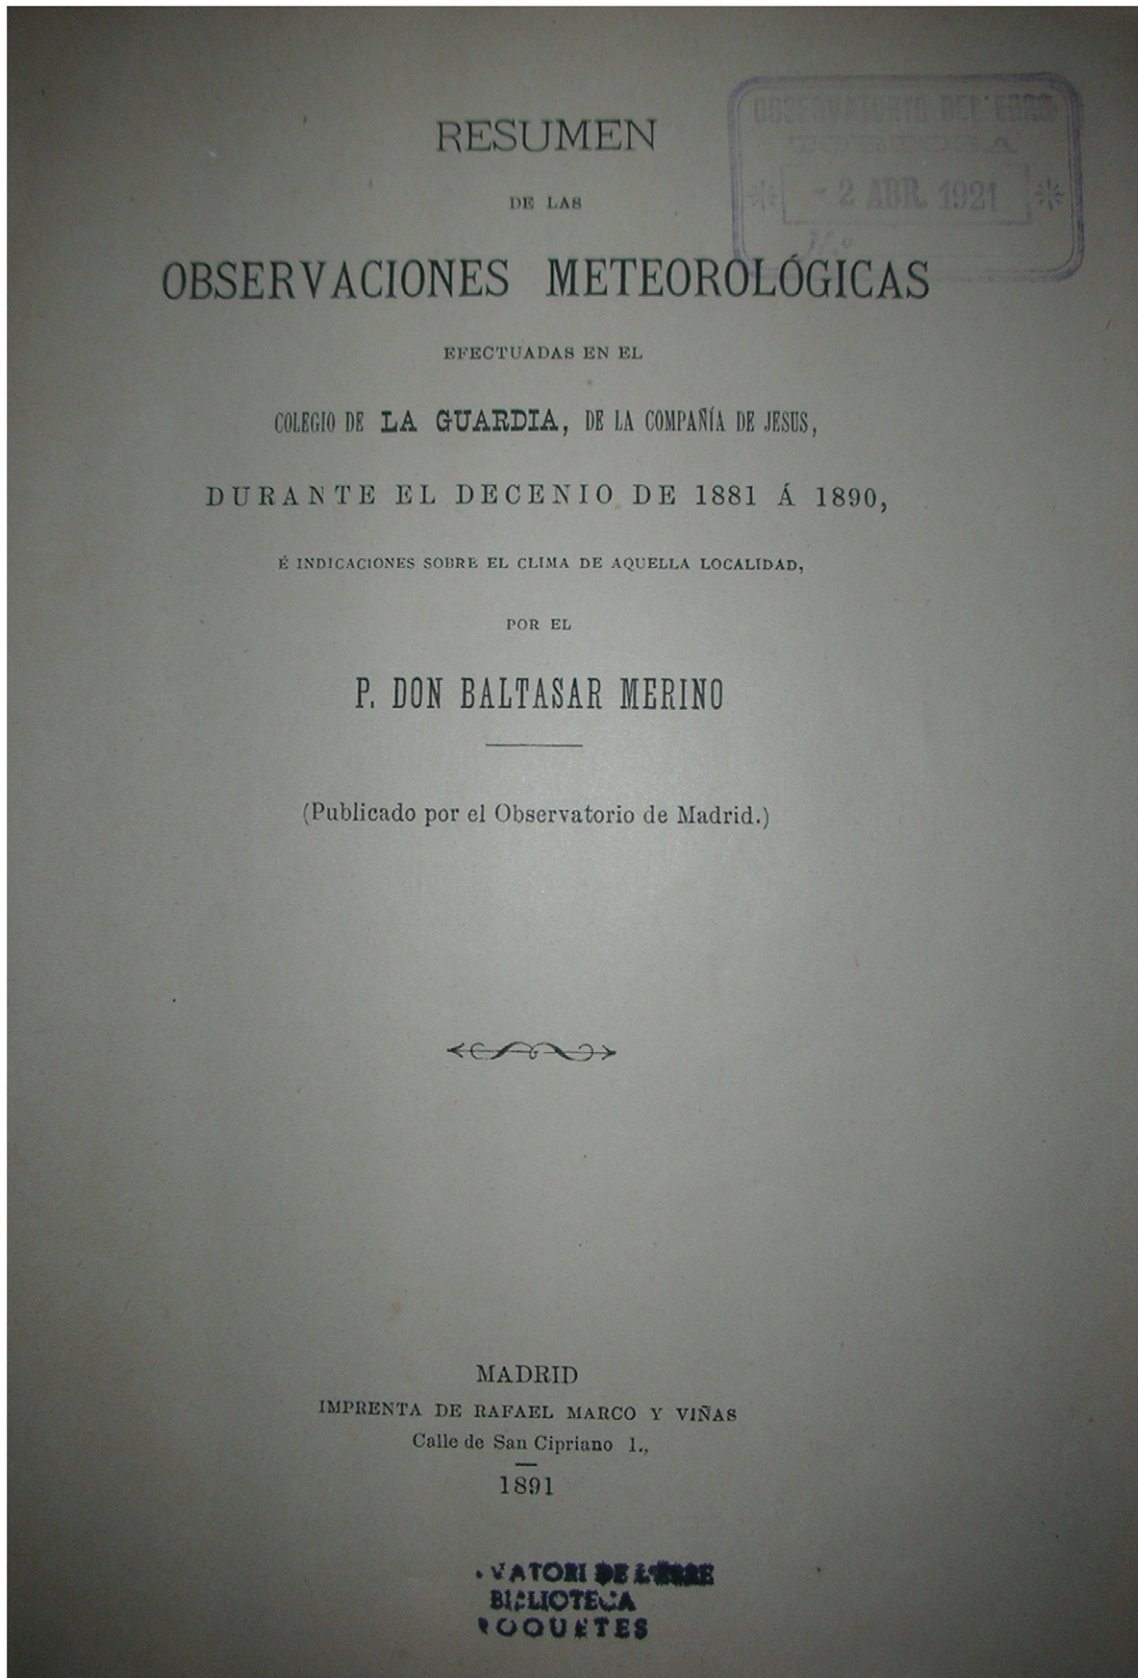

**Figure 2. First page of the Notebook I [16].**  
doi:10.1371/journal.pone.0039281.g002

**CUADRO V.**

**Observaciones Meteorológicas. OSCIACIONES BAROMÉTRICAS EXTREMAS. Serie B.**

| AÑOS<br>y períodos. | December. | Enero. | Febrero. | Marzo. | Abril. | Mayo. | Junio. | Julio. | Agosto. | Septiembre. | Octubre. | Noviembre. | Invierno. | Primavera. | Verano. | Ocho. | Año. | AÑOS<br>y períodos. |
|---------------------|-----------|--------|----------|--------|--------|-------|--------|--------|---------|-------------|----------|------------|-----------|------------|---------|-------|------|---------------------|
|                     | mm.       | mm.    | mm.      | mm.    | mm.    | mm.   | mm.    | mm.    | mm.     | mm.         | mm.      | mm.        | mm.       | mm.        | mm.     | mm.   | mm.  |                     |
| 1881.....           | 28,4      | 37,0   | 23,0     | 26,8   | 29,6   | 14,2  | 12,6   | 10,2   | 14,0    | 15,7        | 26,0     | 13,8       | 21,0      | 29,6       | 14,0    | 26,5  | 41,9 | 1881.               |
| 1882.....           | 21,2      | 21,9   | 19,3     | 20,7   | 17,5   | 15,5  | 15,4   | 14,1   | 9,6     | 20,6        | 17,5     | 18,0       | 26,9      | 22,9       | 15,0    | 23,3  | 30,5 | 1882.               |
| 1883.....           | 28,6      | 23,8   | 23,3     | 23,8   | 28,6   | 18,7  | 13,8   | 10,6   | 8,5     | 15,4        | 14,0     | 21,8       | 36,9      | 19,2       | 13,8    | 20,8  | 37,4 | 1883.               |
| 1884.....           | 18,2      | 10,8   | 22,3     | 22,2   | 20,2   | 10,3  | 10,2   | 13,3   | 7,4     | 19,4        | 21,6     | 10,0       | 26,0      | 24,0       | 13,3    | 21,0  | 51,0 | 1884.               |
| 1885.....           | 20,5      | 26,7   | 25,5     | 27,9   | 21,1   | 13,3  | 9,7    | 11,4   | 14,0    | 15,0        | 16,6     | 26,3       | 28,7      | 28,4       | 20,4    | 26,5  | 33,7 | 1885.               |
| 1886.....           | 24,5      | 25,0   | 20,6     | 17,2   | 23,6   | 23,2  | 13,6   | 10,5   | 19,2    | 17,6        | 21,6     | 25,1       | 28,4      | 25,6       | 14,2    | 25,5  | 28,6 | 1886.               |
| 1887.....           | 24,8      | 24,7   | 13,9     | 22,4   | 15,9   | 24,1  | 12,4   | 8,6    | 13,2    | 11,8        | 19,8     | 25,9       | 25,4      | 24,2       | 12,4    | 30,6  | 33,5 | 1887.               |
| 1888.....           | 20,1      | 33,4   | 16,3     | 31,4   | 19,3   | 23,8  | 8,8    | 9,4    | 12,1    | 15,8        | 26,0     | 29,4       | 33,4      | 33,2       | 12,2    | 30,2  | 37,7 | 1888.               |
| 1889.....           | 21,4      | 20,0   | 34,2     | 29,1   | 20,4   | 14,4  | 9,6    | 10,9   | 13,4    | 15,0        | 28,4     | 11,2       | 34,2      | 29,1       | 13,4    | 34,0  | 39,5 | 1889.               |
| 1890.....           | 14,3      | 22,5   | 18,8     | 24,1   | 33,7   | 21,0  | 11,8   | 8,5    | 11,4    | 15,1        | 19,7     | 18,8       | 25,2      | 35,7       | 13,8    | 18,8  | 38,7 | 1890.               |
| 1881-85..           | 34,1      | 43,7   | 33,6     | 33,4   | 32,3   | 19,3  | 13,8   | 17,2   | 18,8    | 18,2        | 28,5     | 20,2       | 43,7      | 33,6       | 20,4    | 30,9  | 43,7 | 1881-85.            |
| 1886-90..           | 32,3      | 33,4   | 34,2     | 34,5   | 33,7   | 23,2  | 17,9   | 12,3   | 14,7    | 20,4        | 34,1     | 36,2       | 33,5      | 35,7       | 17,9    | 37,4  | 40,8 | 1886-90.            |
| 1881-90..           | 34,9      | 43,7   | 34,2     | 34,5   | 33,7   | 25,2  | 17,9   | 17,3   | 20,0    | 20,6        | 34,1     | 36,4       | 43,7      | 35,7       | 21,2    | 37,4  | 43,7 | 1881-90.            |

**Figure 3. Example of a table showing data on extreme barometric oscillations from Notebook I [16].**  
doi:10.1371/journal.pone.0039281.g003

A Guarda College, of the Society of Jesus, for the decade 1881 to 1890) [16]. This notebook contains descriptions of the observatory, its location, the materials used to build it, as well as the instrumentation and the metadata for the measurement procedures.

Figures 2, 3 and 4 show the cover of the notebook and some examples of data included therein. The characteristics of the data contained in the notebook are given in Table 1. The data include readings of pressure and temperature (mean, minimum and maximum), as well as oscillations (diurnal and maximum), mean relative humidity, vapor pressure, precipitation (number of days with rainfall and depth of rainfall), mean evaporation, general observations of weather, as well as wind speed and direction. All the data are shown as monthly, annual and five-year values. The data series are splitted into two different series, namely “A”, where the different variables are displayed jointly in the same table in annual and seasonal periods, and “B”, with a different table for each variable shown (Figure 3). The last part of the notebook contains comparative graphs of the different variables studied. An example is provided in Figure 4.

**Notebook II.** Notebook II was published in 1893 under its original title “Estudio sobre las Borrascas en la costa occidental de Galicia” (Study of extratropical cyclones for the western coast of Galicia) [18]. It should be noted that the criterion used in this notebook to denote an extratropical cyclone is not the same as the WMO criterion, as will be explained later. In this notebook Father Merino proposed, at the end of the 19th century, the constitution of a European meteorological service that would focus on the Atlantic region. Table 1 shows the characteristics of the data contained in this notebook, which cover the period 1881–91.

The main focus of Notebook II is the study of low pressures and of meteorological phenomena that affect sailing. It therefore contains a complete description of the aneroid barometer and its applications. It starts with an analysis of the dangers of low-pressure areas to sailors and contains a complete study of their characteristics when arriving at the west coast of Galicia. A methodology for forecasting this phenomenon is also proposed. The data contained in the notebook are values of pressure and wind speed and direction for some days, measured twice a day (morning and evening), before, during and after the occurrence of different low pressure systems. Figure 5 shows an example of a typical entry in this book.

**Notebook III.** Published in 1894, this notebook was entitled “Observatorio Meteorológico del Colegio de la Compañía de Jesús en La Guardia. Cuaderno Tercero” (Meteorological observatory of the College of the Society of Jesus in La Guardia. Third notebook) [19]. It contains a study of meteoric water and its impact on temperature at A Guarda. It is followed by a complete description of the sources of meteoric water and the process of evaporation in the Atlantic coast of Galicia, with information about its mean temperature, surface and mean daily evaporation. Father Merino explained the process of evaporation for the Atlantic Ocean, focusing on the warmest part of the northern Atlantic Ocean, and estimating an area of  $17 \cdot 10^6 \text{ km}^2$  and a sea surface temperature of  $25^\circ\text{C}$ . He calculated the rate of evaporation per square metre by taking into account the area under consideration and multiplying it by the mean daily evaporation, and then explained the process from evaporation to precipitation.

The characteristics of the data contained in the notebook are shown in Table 1. The recorded data cover the period 1892–3,

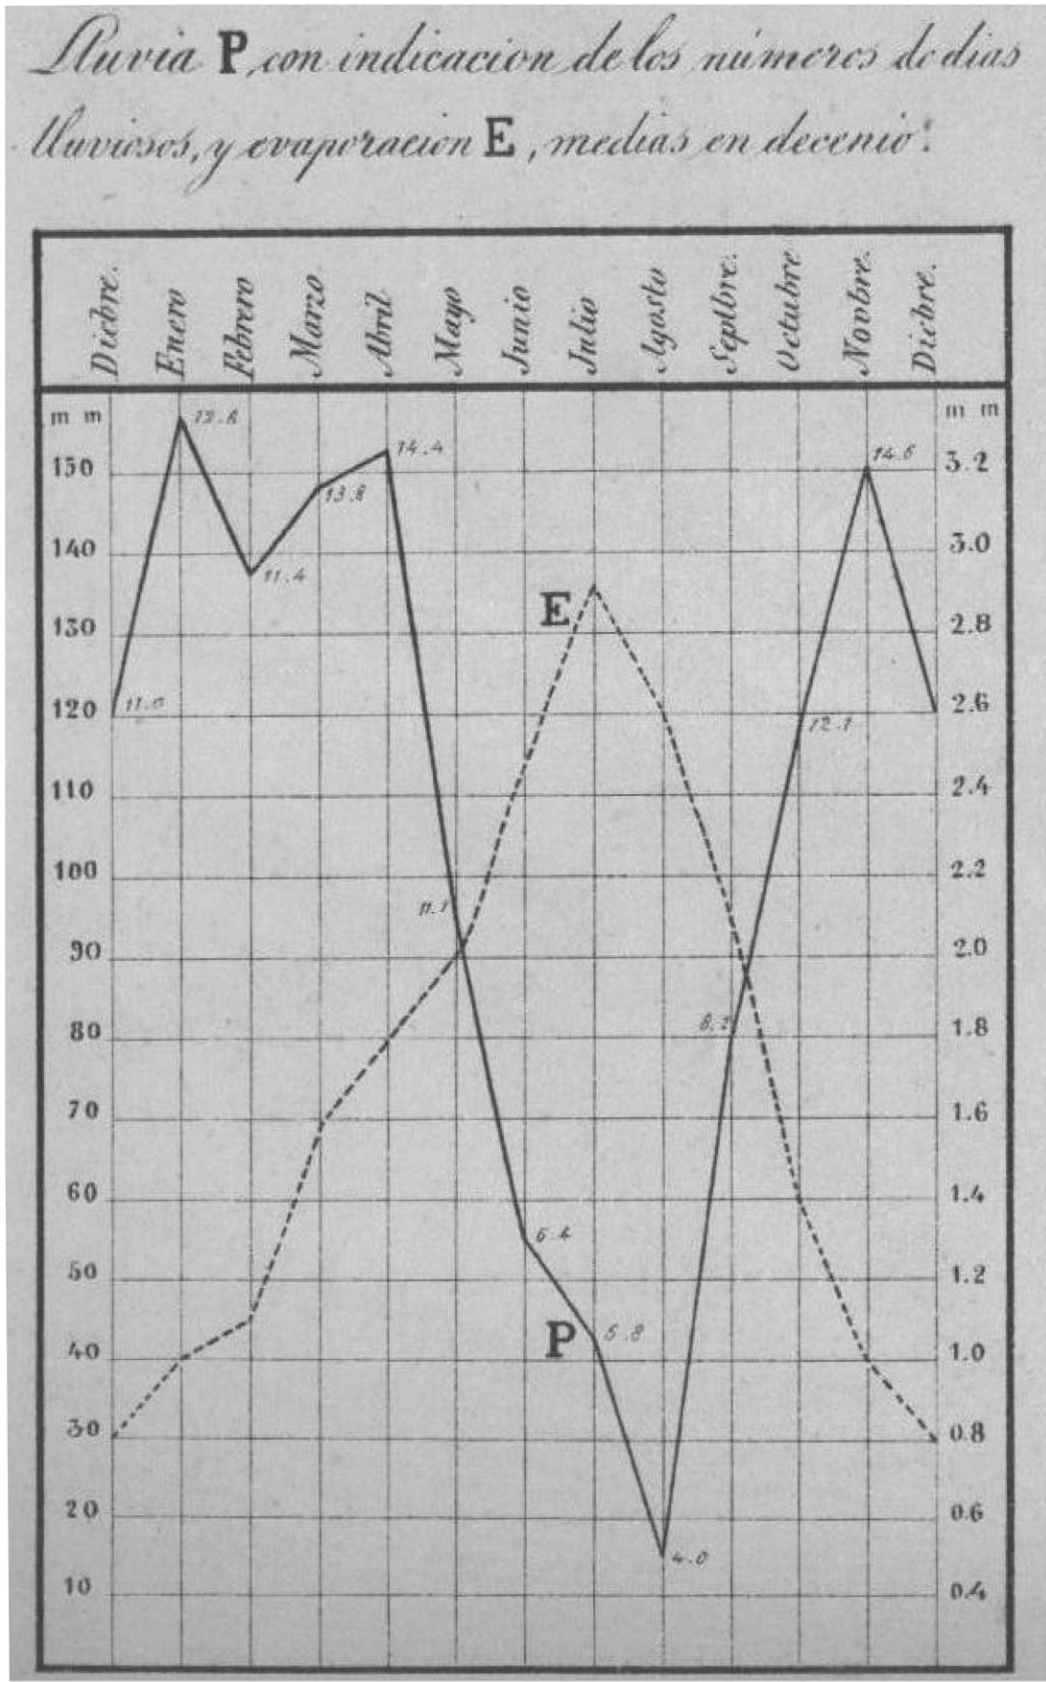

Figure 4. Example of a graph of precipitation and evaporation from Notebook I [16].  
doi:10.1371/journal.pone.0039281.g004

**Table 1.** Characteristics of the data contained in the notebooks.

|              | Formal        | Source format      | photocopy                                        |
|--------------|---------------|--------------------|--------------------------------------------------|
| Notebook I   |               | Information type   | numeric, text, graphical                         |
|              |               | Information format | tables, text                                     |
|              |               | Typing             | printed                                          |
|              |               | Legibility         | clear                                            |
|              | Informational | Data coverage      | Observatory of A Guarda, 1881–1890               |
|              |               | Quality            | good                                             |
| Notebook II  | Formal        | Redundancy         | reports from the local newspaper “La Integridad” |
|              |               | Source format      | photocopy                                        |
|              |               | Information type   | numeric, text                                    |
|              |               | Information format | tables, graphs, text                             |
|              |               | Typing             | printed                                          |
|              |               | Legibility         | clear                                            |
| Notebook III | Informational | Data coverage      | Observatory of A Guarda, 1881–1891               |
|              |               | Quality            | good                                             |
|              |               | Redundancy         | reports from the local newspaper “La Integridad” |
|              | Formal        | Source format      | photocopy                                        |
|              |               | Information type   | numeric, text                                    |
|              |               | Information format | tables, text                                     |
| Notebook IV  |               | Typing             | printed                                          |
|              |               | Legibility         | clear                                            |
|              | Informational | Data coverage      | Observatory of A Guarda, 1892–1893               |
|              |               | Quality            | good                                             |
|              |               | Redundancy         | reports from the local newspaper “La Integridad” |
|              |               | Source format      | photocopy                                        |

doi:10.1371/journal.pone.0039281.t001

and are shown by splitting each month into three periods of ten days (termed “décadas” in the notebook) and comprise:

- mean, maximum and minimum values of temperature
- monthly mean values of temperature
- number of cloudy days and quantification of cloud cover (cloud-free, cloudy, obscured)
- dominant winds

days with precipitation and depth of rainfall (in mm, L and L/ $m^2$ )

Figure 6 shows a page of this data as recorded in the notebook. The notebook also contains two tables: the first shows the monthly amount of water recorded in the rain gauge, including the depth in mm, the volume in litres and the corresponding number of litres per square metre (see Figure 7); the second shows an estimate of the total quantity of water (in litres) precipitated in the valley in which the observatory was located (with an estimated total surface area of  $1 \cdot 10^6 m^2$  and the corresponding values of calories emitted) (see Figure 8). A procedure for the analysis of dissolved chlorine

and ammonia in the rain measured for 1893 and 1894 is also explained.

**Notebook IV.** Published in 1897, the fourth notebook is entitled: “Observatorio Meteorológico del Colegio de la Compañía de Jesús en La Guardia. Cuaderno Cuarto” (Meteorological observatory of the College of the Society of Jesus in La Guardia. Fourth notebook) [20]. It includes meteorological observations for the period 1891–6. The characteristics of this notebook as a source of data are shown in Table 1 and an example of the information that it contains can be seen in Figure 9.

The first part of this notebook contains a study of the relationship between the vegetation and temperature in the drainage basin of the Miño river. Monthly values of temperature are given for the period 1891–6, and the months are split into periods of ten days called “décadas”. For these periods the variables recorded and averaged are the maximum temperature in the sun, the maximum temperature in the shade, and their difference, the minimum temperature in the shade, the minimum reflected temperature and the difference between them, and the mean, maximum and minimum soil temperature at a depth of

# Mes de Marzo

| Años | Días | Barómetro. |         |        | Vientos. |        | Notas                                                           |
|------|------|------------|---------|--------|----------|--------|-----------------------------------------------------------------|
|      |      | 9 a. m.    | 3 p. m. | Media. | Mañana.  | Tarde. |                                                                 |
| 1881 | 3    | 750,6      | 749,5   | 750,0  | S        | S      | Día tempestuoso: el barómetro baja 13 mm.                       |
|      | 4    | 755,1      | 755,3   | 755,2  | S        | S      | " " sigue bajo el barómetro.                                    |
|      | 5    | 754,5      | 753,0   | 753,7  | S        | S      | " " " "                                                         |
|      | 6    | 751,9      | 751,6   | 751,7  | S        | S      | " " " "                                                         |
|      | 4    | 759,1      | 760,7   | 759,9  | N        | N      | Viento huracanado por la noche: el barómetro baja 13 mm.        |
|      | 20   | 758,1      | 735,8   | 756,9  | SE       | S      | Viento fuerte por la tarde: el barómetro baja 10 mm.            |
| 1883 | 29   | 764,7      | 761,0   | 762,8  | S        | S      | " " el barómetro baja 9 mm.                                     |
|      | 10   | 751,0      | 747,0   | 749,0  | S        | S      | " " el barómetro baja 13 mm.                                    |
| 1884 | 2    | 761,7      | 760,4   | 761,0  | S        | S      | " " el barómetro baja 9 mm. en tres días.                       |
|      | 18   | 759,5      | 759,1   | 759,3  | S        | S      | Viento fuerte por la mañana.                                    |
| 1887 | 15   | 748,8      | 749,1   | 748,9  | N        | N      | Viento fuerte todo el día: el barómetro baja 9 mm. en dos días. |
|      | 21   | 757,1      | 755,6   | 756,3  | S        | S      | " " el barómetro al siguiente día sube 8 mm.                    |
| 1888 | 9    | 765,6      | 763,9   | 764,7  | S        | S      | Viento borrascoso todo el día: el barómetro baja 6 mm.          |
|      | 16   | 750,9      | 751,8   | 751,3  | NO       | O      | " " el barómetro baja 6 mm.                                     |
|      | 17   | 751,6      | 751,6   | 751,6  | N        | N      | Día ventoso: continúa la baja barométrica.                      |
|      | 26   | 741,3      | 746,3   | 743,8  | SO       | SO     | Mañana borrascosa: el barómetro baja 9 mm.                      |
|      | 27   | 745,6      | 743,2   | 744,4  | SO       | S      | Día borrascoso: continúa la baja barométrica.                   |
|      | 28   | 738,2      | 742,9   | 740,5  | NO       | O      | " " continúa bajando el barómetro,                              |
|      | 29   | 751,1      | 753,7   | 752,4  | O        | O      | " " sigue la baja barométrica.                                  |
|      | 6    | 760,9      | 761,0   | 760,9  | SO       | SO     | Día borrascoso: el barómetro baja 3 mm.                         |
|      | 7    | 757,4      | 752,1   | 754,7  | SO       | SO     | Sigue el temporal: el barómetro baja 9 mm.                      |
|      | 8    | 757,3      | 755,6   | 756,4  | NO       | NO     | " " hasta las 8 de la mañana.                                   |
| 1889 | 10   | 743,5      | 742,7   | 743,1  | O        | SO     | Día ventoso: el barómetro baja 14 mm.                           |
|      | 19   | 757,0      | 753,4   | 755,2  | SO       | SO     | Rachas de viento por la mañana: el barómetro baja 5 mm.         |
|      | 20   | 753,5      | 754,2   | 753,8  | O        | SO     | " " todo el día: continúa bajo el barómetro.                    |
|      | 8    | 755,7      | 754,9   | 755,3  | S        | S      | Viento huracanado todo el día: el barómetro baja 8 mm.          |
|      | 11   | 756,3      | 753,7   | 755,0  | SE       | S      | Tarde borrascosa: el barómetro baja en ella 3 mm.               |
| 1891 | 17   | 748,4      | 746,5   | 747,4  | SO       | O      | Viento racheado: el barómetro baja 6 mm.                        |

Inférese de lo que antecede: 1.º Que la media presión en los días que la normal del mismo mes; 2.º Que dominan los vientos cosos del año.

días de mal tiempo es de 753,4 en el mes de Marzo, ó 7 mm. más peligrosos del S. y SO: 3.º Que es uno de los meses más borras-

Figure 5. Example of a typical page containing data from Notebook II [18]. doi:10.1371/journal.pone.0039281.g005

| MES DE DICIEMBRE.-1892 |                   |                  |                    |       |                    |       |                    |            |         |           |         | MES DE DICIEMBRE.-1893 |                  |                    |       |                    |       |                    |            |         |           |  |  |
|------------------------|-------------------|------------------|--------------------|-------|--------------------|-------|--------------------|------------|---------|-----------|---------|------------------------|------------------|--------------------|-------|--------------------|-------|--------------------|------------|---------|-----------|--|--|
| DÉCADAS                | Temperatura media | Oscilación media | Temperatura máxima | Fecha | Temperatura mínima | Fecha | Oscilación extrema | DÍAS       |         |           | DÉCADAS | Temperatura media      | Oscilación media | Temperatura máxima | Fecha | Temperatura mínima | Fecha | Oscilación extrema | DÍAS       |         |           |  |  |
|                        |                   |                  |                    |       |                    |       |                    | Despejados | Nubosos | Cubiertos |         |                        |                  |                    |       |                    |       |                    | Despejados | Nubosos | Cubiertos |  |  |
| 1.ª                    | 12,7              | 5,5              | 16,9               | 5     | 6,0                | 1     | 10,9               | 3          | 6       | 4         | 1.ª     | 8,5                    | 7,1              | 14,9               | 4     | 1,4                | 1     | 13,5               | 6          | 3       | 4         |  |  |
| 2.ª                    | 9,3               | 6,6              | 16,0               | 13    | -1,0               | 20    | 17,0               | 6          | 3       | 4         | 2.ª     | 8,0                    | 8,0              | 14,5               | 13    | 1,3                | 18    | 13,2               | 6          | 3       | 1         |  |  |
| 3.ª                    | 8,6               | 7,0              | 14,7               | 30    | -0,3               | 21    | 15,0               | 2          | 3       | 6         | 3.ª     | 9,0                    | 6,2              | 15,2               | 23    | 0,0                | 29    | 15,2               | 3          | 3       | 8         |  |  |
| Mes.                   | 10,2              | 6,3              | 16,9               | 5     | 1,0                | 20    | 17,9               | 8          | 9       | 14        | Mes.    | 8,5                    | 7,1              | 15,2               | 23    | 0,0                | 29    | 15,2               | 15         | 3       | 13        |  |  |

  

| VIENTOS DOMINANTES INFERIOR Y SUPERIOR |     |      |     |     |      |       |     |     |       | LLUVIA    |       | VIENTOS DOMINANTES INFERIOR Y SUPERIOR |       |     |     |     |     |     |     |       |           | LLUVIA |  |
|----------------------------------------|-----|------|-----|-----|------|-------|-----|-----|-------|-----------|-------|----------------------------------------|-------|-----|-----|-----|-----|-----|-----|-------|-----------|--------|--|
|                                        | N.  | NE.  | E.  | SE. | S.   | SO.   | O.  | NO. |       | Cantidad. | Días. |                                        | N.    | NE. | E.  | SE. | S.  | SO. | O.  | NO.   | Cantidad. | Días.  |  |
| 1.ª                                    | 0-1 | 0-0  | 0-0 | 1-0 | 9-2  | 8-6   | 0-0 | 2-1 | 27,8  | 4         | 1.ª   | 4-0                                    | 11-8  | 0-0 | 0-0 | 2-0 | 0-0 | 0-1 | 3-1 | 8,5   | 1         |        |  |
| 2.ª                                    | 1-1 | 11-3 | 0-0 | 0-0 | 0-0  | 6-1   | 0-2 | 2-1 | 6,0   | 1         | 2.ª   | 5-1                                    | 9-2   | 1-0 | 0-0 | 1-0 | 0-0 | 0-0 | 4-2 | 22,6  | 2         |        |  |
| 3.ª                                    | 0-1 | 7-1  | 0-0 | 2-0 | 2-2  | 10-3  | 0-2 | 1-1 | 88,4  | 6         | 3.ª   | 4-1                                    | 4-0   | 0-0 | 3-0 | 5-3 | 1-1 | 3-0 | 2-3 | 71,5  | 6         |        |  |
| Mes.                                   | 1-3 | 18-4 | 0-0 | 3-0 | 11-4 | 24-10 | 0-4 | 5-3 | 122,2 | 11        | Mes.  | 13-2                                   | 24-10 | 1-0 | 3-0 | 8-3 | 1-1 | 3-1 | 9-6 | 102,6 | 9         |        |  |

  

| MES DE ENERO.-1892 |                   |                  |                    |       |                    |       |                    |            |         |           |         | MES DE ENERO.-1893 |                  |                    |       |                    |       |                    |            |         |           |  |  |
|--------------------|-------------------|------------------|--------------------|-------|--------------------|-------|--------------------|------------|---------|-----------|---------|--------------------|------------------|--------------------|-------|--------------------|-------|--------------------|------------|---------|-----------|--|--|
| DÉCADAS            | Temperatura media | Oscilación media | Temperatura máxima | Fecha | Temperatura mínima | Fecha | Oscilación extrema | DÍAS       |         |           | DÉCADAS | Temperatura media  | Oscilación media | Temperatura máxima | Fecha | Temperatura mínima | Fecha | Oscilación extrema | DÍAS       |         |           |  |  |
|                    |                   |                  |                    |       |                    |       |                    | Despejados | Nubosos | Cubiertos |         |                    |                  |                    |       |                    |       |                    | Despejados | Nubosos | Cubiertos |  |  |
| 1.ª                | 7,7               | 6,2              | 12,8               | 1     | 0,2                | 6     | 12,6               | 3          | 4       | 3         | 1.ª     | 7,3                | 6,8              | 13,4               | 9     | 1,5                | 2     | 11,9               | 6          | 1       | 3         |  |  |
| 2.ª                | 7,7               | 7,4              | 12,2               | 14    | 2,1                | 19    | 10,1               | 3          | 4       | 6         | 2.ª     | 6,8                | 8,2              | 13,5               | 19    | -1,1               | 14    | 14,6               | 6          | 2       | 2         |  |  |
| 3.ª                | 9,7               | 10,1             | 15,8               | 25    | 2,5                | 28    | 13,3               | 10         | 1       | 3         | 3.ª     | 8,6                | 8,8              | 15,7               | 29    | -0,8               | 25    | 16,5               | 5          | 1       | 5         |  |  |
| Mes.               | 8,3               | 7,9              | 15,8               | 25    | 0,2                | 6     | 15,6               | 13         | 9       | 9         | Mes.    | 7,6                | 7,9              | 15,7               | 29    | -1,1               | 14    | 16,8               | 17         | 4       | 10        |  |  |

  

| VIENTOS DOMINANTES INFERIOR Y SUPERIOR |      |      |     |     |     |     |     |     |       | LLUVIA    |       | VIENTOS DOMINANTES INFERIOR Y SUPERIOR |      |     |     |      |     |     |     |       |           | LLUVIA |  |
|----------------------------------------|------|------|-----|-----|-----|-----|-----|-----|-------|-----------|-------|----------------------------------------|------|-----|-----|------|-----|-----|-----|-------|-----------|--------|--|
|                                        | N.   | NE.  | E.  | SE. | S.  | SO. | O.  | NO. |       | Cantidad. | Días. |                                        | N.   | NE. | E.  | SE.  | S.  | SO. | O.  | NO.   | Cantidad. | Días.  |  |
| 1.ª                                    | 8-2  | 3-1  | 1-0 | 1-0 | 1-1 | 2-2 | 1-0 | 3-1 | 60,7  | 4         | 1.ª   | 8-0                                    | 4-1  | 0-0 | 1-0 | 1-1  | 0-3 | 0-1 | 6-2 | 75,4  | 2         |        |  |
| 2.ª                                    | 3-3  | 4-0  | 0-0 | 7-0 | 1-3 | 4-3 | 1-1 | 0-0 | 161,5 | 8         | 2.ª   | 9-3                                    | 11-3 | 0-0 | 0-0 | 0-1  | 0-1 | 0-0 | 0-0 | 11,0  | 2         |        |  |
| 3.ª                                    | 4-1  | 13-0 | 0-2 | 0-0 | 0-1 | 0-1 | 0-0 | 5-3 | 3     | 3         | 3.ª   | 2-0                                    | 8-4  | 0-0 | 1-1 | 9-5  | 1-0 | 1-0 | 0-0 | 50,5  | 4         |        |  |
| Mes.                                   | 15-6 | 20-1 | 1-2 | 8-0 | 2-5 | 6-6 | 2-1 | 8-4 | 222,2 | 12        | Mes.  | 19-3                                   | 23-8 | 0-0 | 2-1 | 10-6 | 1-4 | 1-1 | 6-2 | 136,9 | 8         |        |  |

Figure 6. Example of a table showing data split into periods of ten days of dominant winds and precipitation from Notebook III [19].  
doi:10.1371/journal.pone.0039281.g006

AGUA CAIDA EN EL PLUVIÓMETRO  
AÑOS 1892-1893

| 1892<br>MESES  | AGUA EN EL PLUVIÓMETRO |                    | Lluvia en litros en 1 m <sup>2</sup> | 1893<br>MESES  | AGUA EN EL PLUVIÓMETRO |                    | Lluvia en litros en 1 m <sup>2</sup> |
|----------------|------------------------|--------------------|--------------------------------------|----------------|------------------------|--------------------|--------------------------------------|
|                | Altura en mm.          | Volumen en litros. |                                      |                | Altura en mm.          | Volumen en litros. |                                      |
| Diciembre..    | 122                    | 3,833              | 127,8                                | Diciembre..    | 103                    | 3,236              | 107,9                                |
| Enero. . . .   | 222                    | 6,974              | 232,5                                | Enero. . . .   | 137                    | 4,304              | 143,5                                |
| Febrero. . .   | 213                    | 6,692              | 223,1                                | Febrero. . .   | 211                    | 6,629              | 221,0                                |
| Marzo. . . .   | 208                    | 6,534              | 217,8                                | Marzo. . . .   | 22                     | 0,691              | 23,0                                 |
| Abril. . . . . | 71                     | 2,230              | 74,3                                 | Abril. . . . . | 80                     | 2,513              | 83,8                                 |
| Mayo. . . . .  | 107                    | 3,361              | 112,0                                | Mayo. . . . .  | 169                    | 5,309              | 176,9                                |
| Junio. . . . . | 81                     | 2,545              | 84,8                                 | Junio. . . . . | 146                    | 4,587              | 152,8                                |
| Julio. . . . . | 49                     | 1,539              | 51,3                                 | Julio. . . . . | 42                     | 1,319              | 44,0                                 |
| Agosto. . . .  | 38                     | 1,194              | 39,8                                 | Agosto. . . .  | 4                      | 0,126              | 4,2                                  |
| Septiembre     | 18                     | 0,565              | 18,8                                 | Septiembre     | 138                    | 4,335              | 144,5                                |
| Octubre. . .   | 337                    | 10,587             | 352,9                                | Octubre. . .   | 181                    | 5,686              | 189,5                                |
| Noviembre.     | 127                    | 3,990              | 133,0                                | Noviembre.     | 206                    | 6,471              | 215,7                                |
| Año. . . . .   | 1593                   | 50,044             | 1668,1                               | Año. . . . .   | 1439                   | 45,206             | 1506,9                               |

Figure 7. Example of a table showing data on precipitation measured by rain gauge from Notebook III [19].  
doi:10.1371/journal.pone.0039281.g007



## LITROS DE LLUVIA CAIDA EN ESTE VALLE Y CALORIAS DESPRENDIDAS

AÑOS 1892-1893

| 1892<br>—<br>MESES | LITROS<br>de la lluvia caída<br>en este valle. | CALORIAS<br>desprendidas. | 1893<br>—<br>MESES | LITROS<br>de la lluvia caída<br>en este valle. | CALORIAS<br>desprendidas. |
|--------------------|------------------------------------------------|---------------------------|--------------------|------------------------------------------------|---------------------------|
| Diciembre.....     | 1278000000                                     | 752901750000              | Diciembre.....     | 1079000000                                     | 635665875000              |
| Enero.....         | 2325000000                                     | 1369715625000             | Enero.....         | 1435000000                                     | 845394375000              |
| Febrero.....       | 2231000000                                     | 1314337875000             | Febrero.....       | 2210000000                                     | 1301966250000             |
| Marzo.....         | 2178000000                                     | 1283114250000             | Marzo.....         | 2300000000                                     | 135498750000              |
| Abril.....         | 743000000                                      | 437719875000              | Abril.....         | 838000000                                      | 493686750000              |
| Mayo.....          | 1120000000                                     | 659820000000              | Mayo.....          | 1769000000                                     | 1042162125000             |
| Junio.....         | 848000000                                      | 499578000000              | Junio.....         | 1528000000                                     | 900772125000              |
| Julio.....         | 513000000                                      | 302221125000              | Julio.....         | 440000000                                      | 259215000000              |
| Agosto.....        | 398000000                                      | 234471750000              | Agosto.....        | 420000000                                      | 24743250000               |
| Septiembre.....    | 188000000                                      | 110755500000              | Septiembre.....    | 1445000000                                     | 851285625000              |
| Octubre.....       | 3529000000                                     | 2079022125000             | Octubre.....       | 1895000000                                     | 1116391875000             |
| Noviembre.....     | 1330000000                                     | 783536250000              | Noviembre.....     | 2157000000                                     | 1270742625000             |
| Año.....           | 16681000000                                    | 9827194125000             | Año.....           | 15069000000                                    | 8877524625000             |

Figure 8. Estimated precipitation for the valley and calories emitted, from Notebook III [1].

doi:10.1371/journal.pone.0039281.g008

30 cm. The flora in the area around the observatory are also described.

The second part of this notebook contains meteorological data for the period 1894–6, including daily, monthly, seasonal and annual means. The variables recorded are the dominant wind direction, the wind strength, the cloud coverage and direction, the maximum, minimum and mean temperature, the mean pressure, relative humidity, mean vapour pressure, evaporation, rainfall and also daily subjective records of the observed weather conditions (e.g., “good weather”, “changing weather”, or “bad weather”).

## Results

### Data Series Recovered and Digitized

The data contained in the book are now available in Open-Document format [21,22], an open and accessible and internationally standard, freely accessible open format available on the internet. The data can be downloaded from: <http://ephyslab.uvigo.es/documentos/AGuarda-recovered.ods>.

We now list the recovered and digitized data series with the corresponding units where it is of application:

- Notebook I, 1881–1890
  - mean monthly pressure (mmHg) and temperature ( $^{\circ}$ C), and corresponding maximum and daily oscillations
  - mean monthly relative humidity (%), vapour pressure (mmHg) and evaporation (mm)
  - total precipitation (mm) and number of rainy days
  - number of days with wind from each direction (N, NE, E, SE, S, SW, W, NW)
  - number of days with wind according to wind speed (calm, breeze, windy, strong)
  - general weather observations (tempest, hail, fog, cloudy, overcast, scatter, clear)
- Notebook II, 1881–1890
  - “extratropical cyclone days”
  - pressure (mmHg) for extratropical cyclone days
  - wind (N, NE, E, SE, S, SW, W, NW) direction for extratropical cyclone days
- Notebook III, 1892–1893
  - days of Moon phases
  - mean, maximum and minimum daily temperature ( $^{\circ}$ C)
  - mean, maximum and minimum daily pressure (mmHg)

**TEMPERATURA EN EL MES DE JUNIO**  
**DURANTE EL QUINQUENIO DE 1891-1895**

|                              | PROMEDIO        |                    |                   | PROMEDIO           |                       |                   | Temperatura media<br>$\frac{T+t}{2}$ | DIFERENCIA<br>T-t | Temperatura a 30 cm<br>bajo tierra. |         | DIFERENCIA |
|------------------------------|-----------------|--------------------|-------------------|--------------------|-----------------------|-------------------|--------------------------------------|-------------------|-------------------------------------|---------|------------|
|                              | Maxima.<br>Sol. | Maxima.<br>Sombra. | DIFERENCIA<br>T-T | Minima.<br>Sombra. | Minima.<br>Reflector. | DIFERENCIA<br>t-t |                                      |                   | Maxima.                             | Minima. |            |
|                              | T'              | T                  | T-T               | t                  | t'                    | t-t               |                                      |                   |                                     |         |            |
| <b>DECADA 1.<sup>a</sup></b> |                 |                    |                   |                    |                       |                   |                                      |                   |                                     |         |            |
| 1891 . . . . .               | 21,6            | 17,4               | 4,2               | 11,6               | 9,3                   | 2,3               | 14,4                                 | 5,7               | »                                   | »       | »          |
| 92 . . . . .                 | 29,1            | 23,1               | 6,0               | 14,1               | 11,9                  | 2,2               | 18,6                                 | 9,0               | 20,0                                | 15,2    | 4,8        |
| 93 . . . . .                 | 32,6            | 26,4               | 6,2               | 14,0               | 12,2                  | 2,0               | 20,2                                 | 12,4              | 20,2                                | 16,2    | 4,0        |
| 94 . . . . .                 | 26,5            | 20,1               | 6,4               | 12,8               | 10,8                  | 2,0               | 16,4                                 | 7,3               | 17,1                                | 13,9    | 3,2        |
| 95 . . . . .                 | 29,4            | 23,9               | 5,5               | 13,1               | 11,8                  | 1,3               | 18,5                                 | 10,8              | 17,1                                | 14,8    | 2,3        |
| Media . . . . .              | 27,8            | 22,2               | 5,6               | 13,1               | 11,2                  | 1,9               | 17,6                                 | 9,1               | 18,6                                | 14,9    | 3,7        |
| <b>DECADA 2.<sup>a</sup></b> |                 |                    |                   |                    |                       |                   |                                      |                   |                                     |         |            |
| 1891 . . . . .               | 37,0            | 29,6               | 7,4               | 13,7               | 10,6                  | 3,1               | 21,6                                 | 15,9              | »                                   | »       | »          |
| 92 . . . . .                 | 28,4            | 21,7               | 6,7               | 12,1               | 10,4                  | 1,7               | 16,9                                 | 9,6               | 20,8                                | 14,7    | 6,1        |
| 93 . . . . .                 | 32,0            | 24,8               | 7,2               | 15,3               | 13,5                  | 1,8               | 20,0                                 | 9,5               | 20,5                                | 17,0    | 3,5        |
| 94 . . . . .                 | 31,7            | 25,9               | 5,8               | 13,3               | 11,0                  | 2,3               | 19,6                                 | 12,6              | 20,4                                | 15,3    | 5,1        |
| 95 . . . . .                 | 30,9            | 25,1               | 5,8               | 13,4               | 11,9                  | 1,5               | 19,2                                 | 11,7              | 20,0                                | 16,5    | 3,5        |
| Media . . . . .              | 32,0            | 25,4               | 6,6               | 13,6               | 11,5                  | 2,1               | 19,5                                 | 11,8              | 20,4                                | 15,9    | 4,5        |
| <b>DECADA 3.<sup>a</sup></b> |                 |                    |                   |                    |                       |                   |                                      |                   |                                     |         |            |
| 1891 . . . . .               | 29,1            | 23,2               | 5,9               | 14,9               | 12,4                  | 2,5               | 19,0                                 | 8,3               | »                                   | »       | »          |
| 92 . . . . .                 | 30,7            | 25,0               | 5,7               | 15,2               | 13,4                  | 1,8               | 20,1                                 | 9,8               | 22,6                                | 16,9    | 5,7        |
| 93 . . . . .                 | 29,5            | 23,4               | 6,1               | 14,3               | 12,6                  | 1,7               | 18,8                                 | 9,1               | 20,2                                | 16,2    | 4,0        |
| 94 . . . . .                 | 32,0            | 25,3               | 6,7               | 15,6               | 13,4                  | 2,2               | 20,4                                 | 9,7               | 21,4                                | 17,1    | 4,3        |
| 95 . . . . .                 | 34,6            | 28,0               | 6,6               | 15,9               | 14,1                  | 1,8               | 22,0                                 | 12,1              | 21,8                                | 18,0    | 3,8        |
| Media . . . . .              | 31,2            | 25,0               | 6,2               | 15,2               | 13,2                  | 2,0               | 20,1                                 | 9,8               | 21,5                                | 17,0    | 4,5        |
| Mes. . . . .                 | 30,3            | 24,2               | 6,1               | 13,9               | 11,9                  | 2,0               | 19,1                                 | 10,2              | 20,2                                | 15,9    | 4,3        |

Figure 9. Example of a table showing data from Notebook IV [20].  
doi:10.1371/journal.pone.0039281.g009

# ESTACION METEOROLÓGICA DEL COLEGIO DEL APÓSTOL SANTIAGO de La Guardia.

**Mes de Octubre de 1904.**

| Días del mes. | TEMPERATURA |      |        | TERMÓMETRO |         | A las 9 de la mañana. |                   |                    |            |         |             |       |            |       |           | Lluvia. | NOTAS |
|---------------|-------------|------|--------|------------|---------|-----------------------|-------------------|--------------------|------------|---------|-------------|-------|------------|-------|-----------|---------|-------|
|               | Máx.        | Mín. | Media. | Seco.      | Húmedo. | Tensión del vapor.    | Humedad relativa. | Presión corregida. | VIENTO     |         | NUBES       |       |            |       |           |         |       |
|               |             |      |        |            |         |                       |                   |                    | Dirección. | Fuerza. | Clase.      | Cant. | Dirección. |       |           |         |       |
| 1             | 20,9        | 17,2 | 19,0   | 17,8       | 17,3    | 14,0                  | 93                | 766,6              | NW         | 2       | Ni.         | 10    | S          | ..... | Δ         |         |       |
| 2             | 20,8        | 12,4 | 16,6   | 18,2       | 16,6    | 13,1                  | 85                | 765,0              | S          | 2       | Ni.         | 6     | SW         | 21,5  | ● 2       |         |       |
| 3             | 16,3        | 9,5  | 12,9   | 15,4       | 13,0    | 9,7                   | 75                | 762,4              | NNE        | 1       | Ni.         | 7     | NW         | 6,5   | ●         |         |       |
| 4             | 25,3        | 9,9  | 18,1   | 18,9       | 15,3    | 10,8                  | 67                | 762,0              | NNE        | 3       | Cu.         | 1     | NNE        | ..... | Bochorno. |         |       |
| 5             | 26,9        | 14,2 | 20,0   | 20,5       | 18,0    | 13,8                  | 77                | 764,5              | N          | 1       | Ci.         | 2     | NNE        | ..... | O P       |         |       |
| 6             | 23,2        | 12,8 | 18,0   | 19,8       | 17,1    | 12,9                  | 75                | 763,7              | N          | 1       | S           | 1     | ?          | ..... | Idem.     |         |       |
| 7             | 21,0        | 12,6 | 16,8   | 20,6       | 18,0    | 13,8                  | 77                | 762,9              | N          | 4       | Ci.         | 2     | SW         | ..... | »         |         |       |
| 8             | 21,0        | 10,2 | 15,6   | 19,8       | 17,0    | 12,7                  | 74                | 767,4              | NE         | 3       | Ci.         | 2     | ?          | ..... | »         |         |       |
| 9             | 20,2        | 8,9  | 14,5   | 18,6       | 16,2    | 12,3                  | 77                | 766,5              | NE         | 1       | Ci.         | 2     | W          | ..... | O P 2     |         |       |
| 10            | 20,8        | 9,4  | 15,1   | 17,4       | 15,0    | 11,2                  | 76                | 764,6              | NW         | 1       | .....       | ..... | .....      | ..... | Neblina.  |         |       |
| 11            | 21,4        | 10,0 | 15,7   | 16,6       | 14,0    | 10,3                  | 73                | 762,0              | NE         | 1       | .....       | ..... | .....      | ..... | .....     |         |       |
| 12            | 20,7        | 10,2 | 15,5   | 15,5       | 12,8    | 9,3                   | 71                | 761,6              | NW         | 2       | .....       | ..... | .....      | ..... | ■ 2       |         |       |
| 13            | 21,2        | 9,4  | 15,3   | 15,2       | 12,0    | 8,5                   | 66                | 761,5              | SW         | 3       | A-Cu.       | 1     | SW         | ..... | Idem.     |         |       |
| 14            | 19,8        | 8,4  | 14,1   | 15,0       | 13,2    | 10,2                  | 80                | 759,0              | SW         | 2       | Ci.         | 1     | ?          | ..... | »         |         |       |
| 15            | 19,0        | 9,2  | 14,1   | 16,7       | 15,2    | 12,0                  | 85                | 761,0              | NW         | 2       | Ci.         | 2     | NW         | ..... | »         |         |       |
| 16            | 19,3        | 8,5  | 13,9   | 16,8       | 15,2    | 11,9                  | 84                | 764,8              | Idem.      | 1       | Cu.         | 1     | NE         | ..... | »         |         |       |
| 17            | 19,5        | 8,0  | 13,8   | 13,8       | 13,0    | 10,4                  | 89                | 768,4              | »          | 1       | Ci.         | 2     | NE         | ..... | Neblina.  |         |       |
| 18            | 23,9        | 12,1 | 18,0   | 17,4       | 15,6    | 12,1                  | 82                | 766,9              | »          | 2       | Ci.         | 2     | ?          | ..... | Bochorno. |         |       |
| 19            | 22,7        | 11,1 | 16,9   | 16,4       | 14,5    | 11,2                  | 81                | 766,1              | N          | 2       | .....       | ..... | .....      | ..... | Neblina.  |         |       |
| 20            | 22,6        | 10,1 | 16,3   | 16,8       | 14,2    | 10,4                  | 73                | 768,1              | NE         | 2       | .....       | ..... | .....      | ..... | »         |         |       |
| 21            | 19,3        | 10,1 | 14,7   | 16,8       | 14,6    | 11,0                  | 77                | 765,9              | NE         | 1       | CI.         | 6     | ?          | ..... | .....     |         |       |
| 22            | 17,8        | 9,6  | 13,7   | 14,8       | 14,0    | 11,4                  | 91                | 759,6              | sw         | 2       | A-Str.      | 8     | S          | ..... | ●         |         |       |
| 23            | 18,7        | 12,1 | 15,4   | 16,8       | 15,3    | 12,1                  | 85                | 753,6              | Idem.      | 2       | Cu.         | 7     | S          | 3,0   | ●         |         |       |
| 24            | 21,8        | 12,2 | 17,0   | 20,0       | 16,2    | 11,4                  | 66                | 758,2              | »          | 3       | A-Str.      | 8     | S          | 2,5   | ● 2       |         |       |
| 25            | 24,4        | 17,8 | 21,1   | 22,4       | 18,0    | 12,7                  | 63                | 763,4              | SE         | 3       | Ni. Str-Cu. | 10    | S          | 14,5  | .....     |         |       |
| 26            | 26,2        | 15,8 | 21,0   | 20,0       | 18,2    | 14,5                  | 84                | 764,4              | SE         | 4       | Ci-Cu.      | 6     | SW         | ..... | .....     |         |       |
| 27            | 26,0        | 16,2 | 21,1   | 21,4       | 18,3    | 13,5                  | 71                | 763,1              | SE         | 1       | S-Cu.       | 6     | S          | ..... | ●         |         |       |
| 28            | 21,2        | 15,4 | 18,3   | 18,0       | 17,5    | 14,6                  | 96                | 759,1              | S          | 3       | Ni.         | 5     | S          | 13,0  | ● K       |         |       |
| 29            | 20,3        | 13,9 | 17,1   | 16,5       | 16,0    | 13,3                  | 96                | 757,2              | sw         | 2       | Cu-Ni.      | 6     | SE         | ..... | .....     |         |       |
| 30            | 19,7        | 14,1 | 16,9   | 16,8       | 14,6    | 11,1                  | 78                | 760,6              | NW         | 2       | S-Cu.       | 9     | SW         | ..... | .....     |         |       |
| 31            | 18,9        | 14,3 | 16,6   | 18,6       | 16,2    | 12,3                  | 77                | 764,2              | Idem.      | 1       | Cu.         | 4     | SW         | ..... | .....     |         |       |
| 1.ª déc.      | 21,6        | 11,7 | 16,6   | 18,7       | 16,3    | 12,4                  | 77                | 764,5              | .....      | .....   | .....       | ..... | .....      | ..... | .....     |         |       |
| 2.ª déc.      | 21,0        | 9,7  | 15,3   | 16,0       | 14,0    | 10,7                  | 79                | 764,1              | .....      | .....   | .....       | ..... | .....      | ..... | .....     |         |       |
| 3.ª déc.      | 21,3        | 13,7 | 17,5   | 18,3       | 16,2    | 12,5                  | 80                | 760,8              | .....      | .....   | .....       | ..... | .....      | ..... | .....     |         |       |
| Media.        | 21,3        | 11,7 | 16,5   | 17,7       | 15,5    | 11,9                  | 79                | 763,1              | .....      | .....   | .....       | ..... | .....      | ..... | .....     |         |       |

El Encargado de la Estación,  
*P. B. Merino S. J.*

Figure 10. Example of data contained in the reports of Father Orcolaga.  
doi:10.1371/journal.pone.0039281.g010



**METEOROGRAFÍA**  
OBSERVACIONES  
DEL  
**COLEGIO DEL APOSTOL SANTIAGO**  
**LA GUARDIA**  
Altitud sobre el nivel del mar, ocho metros  
*Día 11 de junio*  
**Barómetro.**—Presión media, 758,9  
**Termómetro.** { Máxima, 19,7  
                  { Mínima, 13,1  
                  { Reflector, 12,0  
Tensión media, 11,6  
Humedad relativa media, 79  
Dirección y fuerza del viento, NO, 3.  
Estado del tiempo, nuboso  
Lluvia, 5,5  
Evaporación, 1,3  
Temperatura al sol, 20,3  
Temperatura á 30 cm. de profundidad, má-  
xima, 16,2.—Mínima, 14,0  
Ozónómetro de M. James, de Sedán, 7  
*Día 13*  
**Barómetro.**—Presión media, 767,5  
**Termómetro.** { Máxima, 20,2  
                  { Mínima, 13,0  
                  { Reflector, 10,0  
Tensión media 12,5  
Humedad relativa media, 80  
Dirección y fuerza del viento, NO-2  
Estado del tiempo, despejado  
Lluvia, 0,0  
Evaporación, 2,2  
Temperatura al sol, 25,3  
Temperatura á 30 cm. de profundidad má-  
xima, 16,9.—Mínima, 15,0  
Ozónómetro de M. James, de Sedán, 8

**Figure 12.** Example of a meteorological report published in “La Integridad”.  
doi:10.1371/journal.pone.0039281.g012

de Compostela (Spain). Following a preliminary analysis, it is apparent that daily or weekly meteorological reports obtained from the observatory of A Guarda were occasionally published in this newspaper. However, we have not been able to complete the recovery and digitization of these reports to the date. Table 3 gives a description of this source of data. These reports, known as “Meteorografía”, include mean daily pressure, temperature, daily maximum and minimum temperature, temperature in the sun, maximum and minimum soil temperature at a depth of 30 cm, mean vapour pressure, mean relative humidity, wind speed and direction, subjective weather (cloudy, etc.), rate of soil cooling, precipitation, evaporation and a value of ozone measured. As it can be seen in Figure 12 no units are indicated.

**Comparisons**

In order to assess the validity of the data recovered, we performed a comparison using data for the periods 1971–2000 and 2001–2009. We compared the mean monthly temperature, pressure and total precipitation, the number of extratropical

**Table 3.** Characteristics of the data contained in La Integridad.

| Formal        | Source format      | microfilm               |
|---------------|--------------------|-------------------------|
|               | Information type   | numeric, text           |
|               | Information format | tables, text            |
|               | Typing             | printed                 |
|               | Legibility         | clear                   |
| Informational | Data coverage      | Observatory of A Guarda |
|               | Quality            | good                    |

doi:10.1371/journal.pone.0039281.t003

cyclones and the monthly mean pressure for extratropical cyclones.

In Figure 13, we compare the monthly total precipitation, monthly mean temperature and pressure and corresponding standard deviation for the periods 1881–1890 (i.e. the recovered data), 1971–2000 (Peinador) and 2001–2010 (the Monte Aloia series). It may be seen that precipitation follows a very similar pattern for the three periods with minimum values in July–August. The values for the two most recent periods closely resemble each other and are generally higher than those for the period of data recovered. The intrannual variability of temperature is extremely similar for both the recovered data and the present data following the typical pattern for extratropical latitudes of the northern hemisphere. The profiles of pressure show the higher corresponding to the hemispheric winter. This is probably a result of the Azores Anticyclone, which is predominant over the region of interest during this season. Its displacement to the Bermudas during the hemispheric summer is probably the cause of the lower mean values of pressure. For 1881–1990 and 1971–2000 the annual minimum pressure occurs in April and for 2001–2010 in July. The absolute values of pressure of A Guarda and Peinador are not comparable with Monte Aloia, but this is simply because of the difference in height between the three stations. The possibility of addressing this by reducing the pressure at Monte Aloia to sea level was not considered feasible, because the the temperature series needed to do this did not have the same temporal homogeneity as the pressure series.

A comparison of the extratropical cyclones shown by the three datasets is not a straightforward matter. From the notebooks, is not clear what Father Merino considers to be an extratropical cyclone. After careful checking of the data, we conclude that it is possible to link the data on extratropical cyclones with a value of pressure. Furthermore, Father Merino seems to state that whenever there is an extratropical cyclone, the wind is at least “fuerte” (strong) or “ventoso” (windy) and sometimes “tempestad” (a tempest). Moreover, in different parts of the notebooks the clear days for A Guarda are linked with values of pressure in excess of 760 mmHg, while 750–760 mmHg correspond to variable weather, 740–750 mmHg corresponds with windy days, 730–740 mmHg corresponds with strong wind days, and values below 730 mmHg correspond with stormy weather. In attending to these criteria and checking the values, we conclude that 755 mmHg represents a better threshold for considering a day to be affected by an extratropical cyclone. We therefore herein consider an extratropical cyclone to be present for those days with values of pressure less than 755 mmHg (aprox. 1006.58 hPa) both for A Guarda and Peinador, where we have data of pressure at sea level. By taking into account the difference in elevation between A Guarda and Monte Aloia, we calculate the corresponding

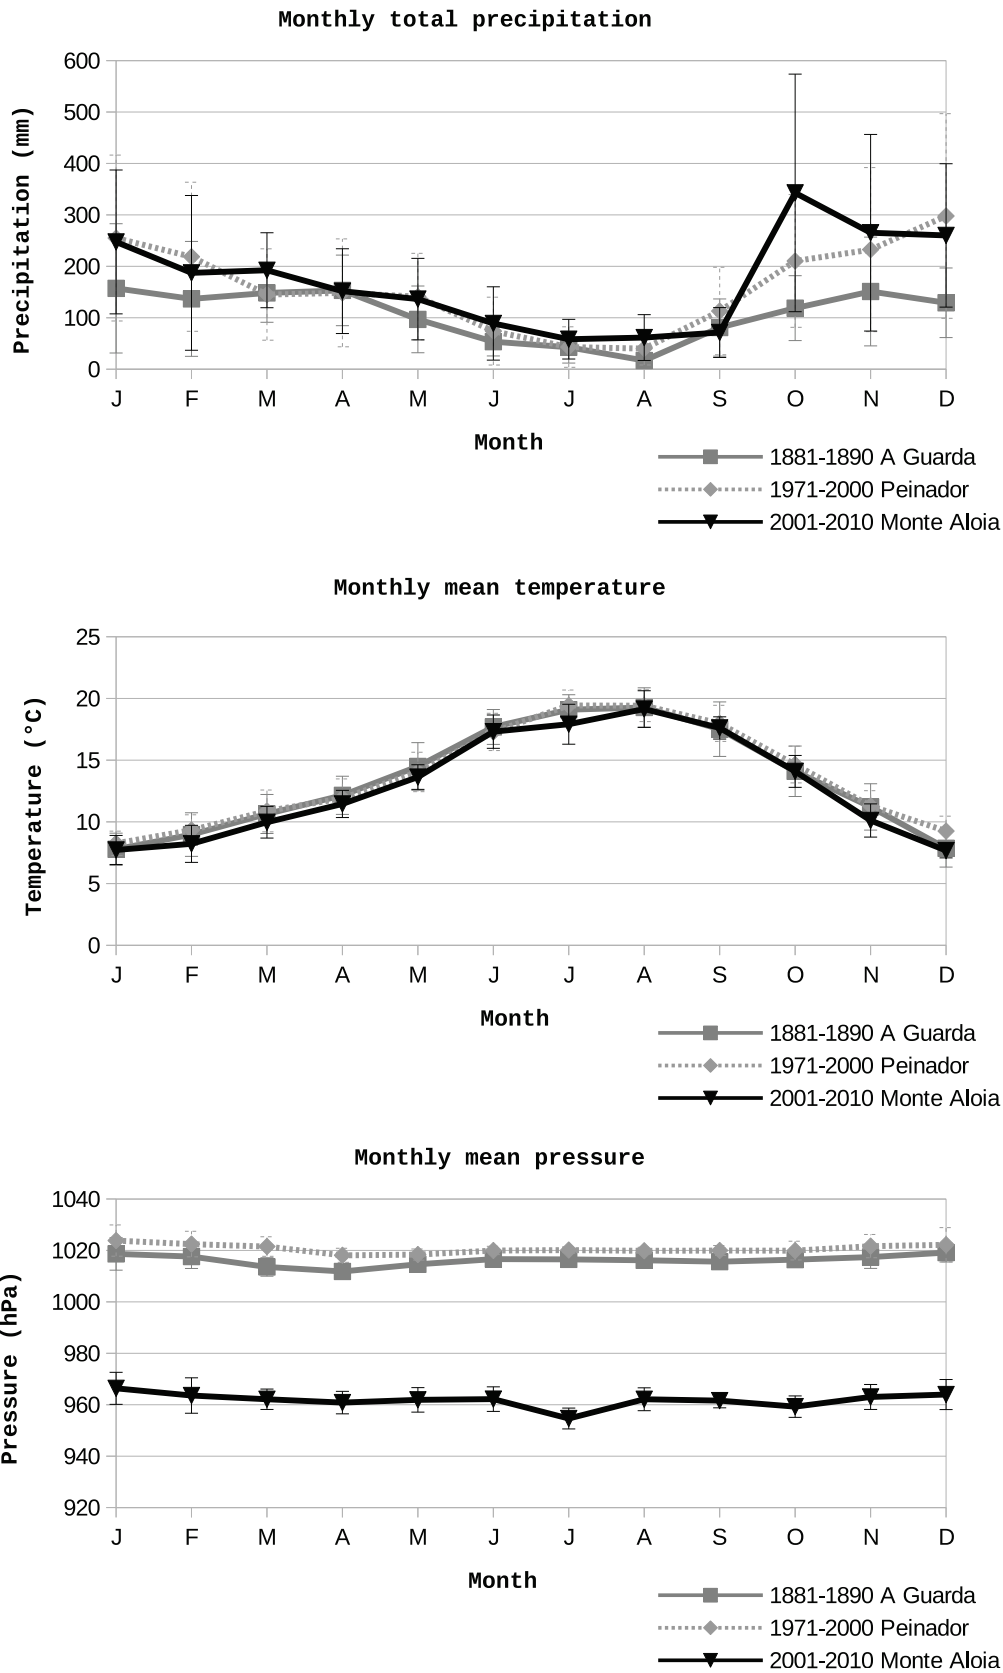

**Figure 13. Monthly total precipitation, mean temperature and mean pressure and corresponding standard deviations for the observatory of A Guarda, Monte Aloia and Peinador.**  
 doi:10.1371/journal.pone.0039281.g013

MONTHLY MEAN OF EXTRATROPICAL CYCLONE DAYS

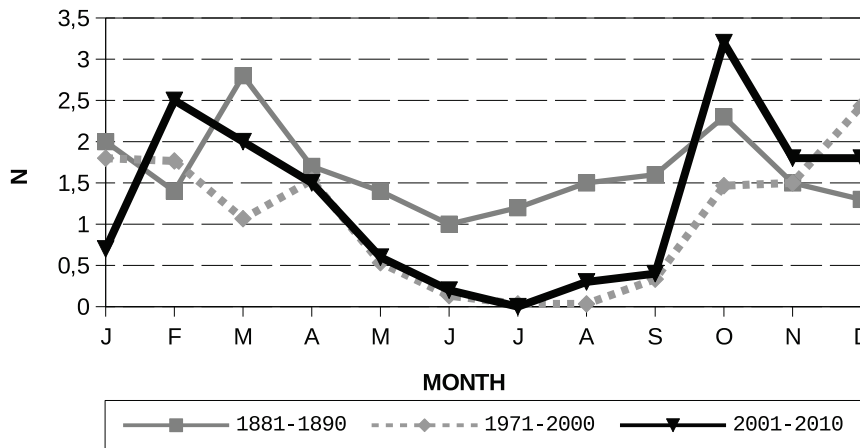

**Figure 14. Monthly number of extratropical cyclones for the periods 1881–1890 (A Guarda observatory), 1971–2000 (Peinador station) and 2001–2010 (Monte Aloia station).**  
doi:10.1371/journal.pone.0039281.g014

threshold pressure for Monte Aloia using the relationship given by Iribarne and Godson [23]:

$$p = 1013.25 \cdot (1 - 2.255 \cdot 10^{-5})^{5.256}$$

where  $p$  is the pressure in hPa and  $H$  is the altitude in meters. The result is a difference of 56.79 hPa, and we therefore consider extratropical cyclone days for Monte Aloia to be those with pressures less than a threshold value of 949.79 hPa. Figure 14 shows a comparison of these days for the three periods. The three records mostly agree in the shape of the intra-annual variation and in some cases in the actual values. It is important to note how the result values for Peinador mostly agree with those for Monte Aloia

and perfectly fit in some cases, which validates the results obtained computing the corresponding sea level pressure. Differences can be because of singular years with an unusual number of extratropical cyclones. This result confirms our correct interpretation of the data contained in the notebooks, and we were therefore able to use them in further comparisons.

Figure 15 shows the intra-annual variation of the mean pressure, using only those days classified as “extratropical cyclone days”. The number of extratropical cyclones used to compute it can be easily followed from Figure 14. The minimum value occurs in 1881–1890 is in April, as for the mean monthly pressure shown in Figure 13. Moreover, for both the recovered series and that obtained from Monte Aloia and Peinador, a steady decrease in pressure may be seen from August to December. As expected, the maximum values of pressure are seen in the hemispheric summer.

MONTHLY MEAN PRESSURE FOR EXTRATROPICAL CYCLONE DAYS

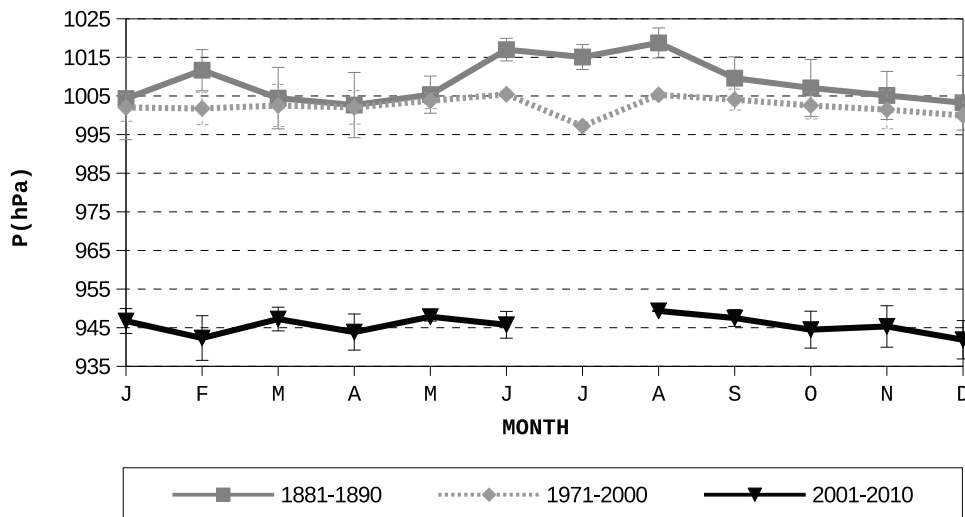

**Figure 15. Monthly mean pressures and corresponding standard deviations for extratropical cyclone days for the periods 1881–90 (A Guarda observatory), 1971–2000 (Peinador station) and 2001–2010 (Monte Aloia station).**  
doi:10.1371/journal.pone.0039281.g015

There were no “extratropical cyclone days” in July at Monte Aloia and just one in Peinador which makes the minimum in pressure less significant than the one for April.

## Discussion

We have herein presented our attempts to recover old instrumental data from documentary sources for the period 1881–96. We have digitized the data series and made them available to the scientific community. We have also compiled an exhaustive set of metadata describing the observatory and its instrumentation. This recovery effort for the northwestern Iberian Peninsula has been entirely worthwhile, as may be seen from our comparisons with more recent data, and wholly relevant for the region of interest, in view of the influence of such phenomena as the North Atlantic Oscillation.

The importance of records of ozone in reports contained in La Integridad can not be overstated; these measurements are not common for the period described here and only a few previous studies have reported similar data for other locations [24–26]. It is also most interesting to note the explanation of a procedure for measuring such chemicals as chlorine and ammonia; these reveal the particularly astute observations of Father Merino in his meteorological analysis.

## References

- Brönnimann S, Annis J, Dann W, Ewen T, Grant AN, et al. (2006) A guide to digitising manuscript climate data. *Clim Past* 2: 137–144.
- WMO (2004) Guidelines on Climate Data Rescue. WMO/TD No. 1210. Technical report, Geneva, Switzerland.
- WMO (2008) MEDARE: Proceedings of the International Workshop on Rescue and Digitization of Climate Records in the Mediterranean Basin. WCDMP No. 67, WMO/TD No. 1432. Technical report, Geneva, Switzerland.
- ACRE (2010) The ACRE Initiative (The International Atmospheric Circulation Reconstructions over the Earth). Available: <http://www.met-acre.org/>. Accessed 2012 Jun 12.
- Jones P, Jonsson T, Wheeler D (1997) Extension to the North Atlantic Oscillation using early instrumental pressure observations from Gibraltar and South-West Iceland. *Int J Clim* 17: 1433–1450.
- Hurrell J (2003) Climate Variability: North Atlantic and Arctic Oscillation, Academic Press, volume 2. 439–445.
- Trigo R, Valente M, Trigo I, Miranda P, Ramos A, et al. (2008) The Impact of North Atlantic Wind and Cyclone Trends on European Precipitation and Significant Wave Height in the Atlantic. *Ann N Y Acad Sci* 1146: 212–234.
- García-Herrera R, García RR, Prieto MR, Hernández E, Gimeno L, et al. (2003) The Use of Spanish Historical Archives. *Bull Amer Meteorol Soc* 84: 1025–1035.
- Rodrigo FS, Barriados M (2008) Reconstruction of seasonal and annual rainfall variability in the Iberian peninsula (16th–20th centuries) from documentary data. *Global Planet Change* 63: 243–257.
- Udías A (1996) Jesuits' contribution to meteorology. *Bull Amer Meteorol Soc* 7: 2307–2315.
- Udías A (2003) Searching the heavens and the Earth: the history of Jesuit observatories. Berlin: Kluwer Academic Publishers. 369.
- Trigo RM, Pozo-Vázquez D, Osborn TJ, Castro-Díez Y, Gámiz-Fortis S, et al. (2004) North Atlantic Oscillation influence on precipitation, river flow and water resources in the Iberian Peninsula. *Int J Clim* 24: 925–944.
- García NO, Gimeno L, de la Torre L, Nieto R, Añel JA (2005) North Atlantic Oscillation (NAO) and precipitation in Galicia (Spain). *Atmósfera*: 25–32.
- Servicio Meteorológico Nacional (1943) Las series más largas de observaciones pluviométricas en la Península Ibérica. Serie D (Estadísticas) N 1.
- Blanco-Durán M, Añel JA, Gimeno L (2008) O observatorio da Guarda. In: Consello da Cultura Galega, editor. *Historia da Meteoroloxía e Climatoloxía de Galicia*. 209.
- Merino B (1891) Resumen de las Observaciones Meteorológicas efectuadas en el Colegio de La Guardia, de la Compañía de Jesús, durante el decenio de 1881 á 1890, é indicaciones sobre el clima de aquella localidad. Observatorio de Madrid.
- Klein Tank AMG, Wijngaard JB, Können GP, Böhm R, Demarée G, et al. (2002) Daily dataset of 20th-century surface air temperature and precipitation series for the European Climate Assessment. *Int J Clim* 22: 1441–1453.
- Merino B (1893) Estudio sobre las Borrascas en la costa occidental de Galicia. Tuy, Spain: Tipografía Gallega. 65.
- Merino B (1894) Observatorio Meteorológico del Colegio de la Compañía de Jesús en La Guardia. Cuaderno Tercero. Tuy, Spain: Galicia Typography.
- Merino B (1897) Observatorio Meteorológico del Colegio de la Compañía de Jesús en La Guardia. Cuaderno Cuarto. Tuy, Spain: Regional Typography.
- OASIS (2005) Open Document Format for Office Applications (OpenDocument) v1.0. Technical report.
- Eisenberg JD (2005) OASIS OpenDocument Essentials, Friends of OpenDocument Inc. 293 p.
- Iribarne JV, Godson WL (1996) *Termodinámica de la Atmósfera*. Madrid, Spain: Ministerio de Medio Ambiente, 296.
- Linville D, Hooker WJ, Olson B (1980) Ozone in michigan's environment 1876–1880. *Mon Wea Rev* 108: 1883–1891.
- Cartalis C, Varotsos C (1994) Surface ozone in athens, greece, at the beginning and at the end of the twentieth century. *Atmos Environ* 28: 3–8.
- Varotsos C, Kalabokas P, Vlasi A, Katsambas A, Stratigos J, et al. (1994) The biologically active ultraviolet radiation in relation to the surface ozone and the wind field. *Tox Environ Chem* 44: 233–242.

It is unfortunate that the way in which the data were originally reported in the notebooks does not allow more complete climatological comparisons to be made. Nevertheless, it is apparent that they represent a valuable source of information, for example for the study of the timing of extreme meteorological events or for the completion of existing data recovery efforts.

## Acknowledgments

The authors would like to thank María Genescá from the Observatori de l'Ebre and Ricardo García-Herrera from the Universidad Complutense de Madrid, for helping them obtain important documentation and the originals of the notebooks. The meteorological data for the Monte Aloia station were obtained from the website of the Consellería de Medio Ambiente, Territorio e Infraestructuras (Regional Government of Galicia). We acknowledge the data providers in the ECA&D project. We thank to three anonymous reviewers and the editor for their helpful comments.

## Author Contributions

Conceived and designed the experiments: JAA LG LdlT. Performed the experiments: JAA MBD. Analyzed the data: JAA MBD LdlT. Wrote the paper: JAA LG LdlT. Digitized the data: MBD.
